# Supplementary material
Source: MDPI journal article supplement (https://www.mdpi.com/search?q=antibiotics-09-00617)
Supplement: s001 [file antibiotics-09-00617-s001.pdf]

Table S1. Comparison of the aetiologies of community-acquired acute pyelonephriti (from the four hospitals, which participated in both periods)

| Pathogens                      | 2010-2011         | 2017-2018         | <i>P</i>     |
|--------------------------------|-------------------|-------------------|--------------|
| <i>Escherichia coli</i>        | 291 (86.6)        | 260 (87.5)        | 0.727        |
| <i>Klebsiella pneumoniae</i>   | 11 (3.3)          | 15 (5.1)          | 0.261        |
| <i>Proteus</i> spp.            | 7 (2.1)           | 5 (1.7)           | 0.731        |
| <i>Enterobacter</i> spp.       | 2 (0.6)           | 3 (1.0)           | 0.670        |
| <i>Citrobacter</i> spp.        | 0 (0)             | 2 (0.7)           | 0.220        |
| <b>Subtotal</b>                | <b>311 (92.5)</b> | <b>285 (95.9)</b> | <b>0.069</b> |
| <i>Pseudomonas aeruginosa</i>  | 1 (0.3)           | 4 (1.3)           | 0.192        |
| <i>Acinetobacter baumannii</i> | 2 (0.6)           | 0 (0)             | 0.501        |
| <i>Enterococcus</i> spp.       | 7 (2.1)           | 4 (1.3)           | 0.228        |
| <i>Staphylococcus aureus</i>   | 2 (0.6)           | 0 (0)             | 0.501        |
| Others                         | 13 (3.9)          | 4 (1.3)           | 0.050        |
| Total                          | 336 (100)         | 297 (100)         | -            |

Table S2. Comparison of antibiotic susceptibilities of uropathogenic *E. coli* isolates (from the four hospitals, which participated in both periods)

|                                     | 2010-2011 (n=291) |               | 2017-2018 (n=248) |               | <i>P</i> |
|-------------------------------------|-------------------|---------------|-------------------|---------------|----------|
|                                     | Sensitive (%)     | Resistant (%) | Sensitive (%)     | Resistant (%) |          |
| Amikacin (AMK)                      | 288 (99.0)        | 3 (1.0)       | 248 (100)         | 0 (0)         | 0.253    |
| Amoxicillin/clavulanate (AMC)       | 152 (80.9)        | 36 (19.1)     | 155 (72.4)        | 59 (27.6)     | 0.047    |
| Ampicillin (AMP)                    | 101 (35.6)        | 183 (64.4)    | 61 (24.6)         | 187 (75.4)    | 0.006    |
| Ampicillin/sulbactam (SAM)          | 55 (51.9)         | 51 (48.1)     | 39 (38.2)         | 63 (61.8)     | 0.048    |
| Aztreonam (ATM)                     | 260 (91.2)        | 25 (8.8)      | 172 (69.4)        | 76 (30.6)     | <0.001   |
| Cefazolin (CFZ)                     | 120 (82.2)        | 26 (17.8)     | 111 (61.7)        | 69 (38.3)     | <0.001   |
| Cefepime (FEP)                      | 262 (92.3)        | 22 (7.7)      | 169 (68.1)        | 79 (31.9)     | <0.001   |
| Cefotaxime (CTX)                    | 269 (92.4)        | 22 (7.6)      | 161 (65.2)        | 86 (34.8)     | <0.001   |
| Cefoxitin (FOX)                     | 174 (96.1)        | 7 (3.9)       | 231 (93.1)        | 17 (6.9)      | 0.184    |
| Ceftazidime (CAZ)                   | 267 (92.1)        | 23 (7.9)      | 171 (69.0)        | 77 (31.0)     | <0.001   |
| Fluoroquinolone (FQ)                | 229 (79.0)        | 61 (21.0)     | 165 (66.5)        | 83 (33.5)     | 0.001    |
| Gentamicin (GEN)                    | 231 (79.4)        | 60 (20.6)     | 166 (66.9)        | 82 (33.1)     | 0.001    |
| Imipenem (IPM)                      | 289 (99.7)        | 1 (0.3)       | 248 (100)         | 0 (0)         | 1.000    |
| Meropenem (MEM)                     | 218 (99.5)        | 1 (0.5)       | 102 (100)         | 0 (0)         | 1.000    |
| Piperacillin (PIP)                  | 69 (35.0)         | 128 (65.0)    | 21 (30.9)         | 47 (69.1)     | 0.534    |
| Piperacillin/tazobactam (TZP)       | 274 (95.1)        | 14 (4.9)      | 234 (94.4)        | 14 (5.6)      | 0.684    |
| Trimethoprim/sulfamethoxazole (SXT) | 184 (71.6)        | 73 (28.4)     | 114 (62.3)        | 69 (37.7)     | 0.040    |
| Tobramycin (TOB)                    | 230 (79.3)        | 60 (20.7)     | 62 (61.4)         | 39 (38.6)     | <0.001   |

Table S3. Comparison of demographic data and risk factors among patients with community-acquired acute pyelonephritis (from the four hospitals, which participated in both periods)

|                                             | 2010-2011 (n=472) | 2017-2018 (n=349) | P      |
|---------------------------------------------|-------------------|-------------------|--------|
| Demographic data                            |                   |                   |        |
| Age (years), mean $\pm$ SD                  | 55.77 $\pm$ 18.60 | 60.71 $\pm$ 17.29 | <0.001 |
| Female sex (%)                              | 441 (93.4)        | 317 (90.8)        | 0.166  |
| Underlying co-morbidities (%)               |                   |                   |        |
| Charlson's comorbidity index, mean $\pm$ SD | 0.68 $\pm$ 1.17   | 1.04 $\pm$ 1.39   | <0.001 |
| Diabetes mellitus                           | 119 (25.2)        | 113 (32.4)        | 0.024  |
| Hemiplegia                                  | 9 (1.9)           | 3 (0.9)           | 0.216  |
| Cerebrovascular accident                    | 36 (7.6)          | 34 (9.7)          | 0.283  |
| Congestive heart failure                    | 25 (5.3)          | 12 (3.4)          | 0.205  |
| Connective tissue disease                   | 8 (1.7)           | 22 (6.3)          | 0.001  |
| Malignancy                                  | 15 (3.2)          | 32 (9.2)          | <0.001 |
| Chronic pulmonary disease                   | 9 (1.9)           | 11 (3.2)          | 0.253  |
| Liver disease                               | 11 (2.3)          | 19 (5.4)          | 0.019  |
| Renal disease                               | 17 (3.6)          | 25 (7.2)          | 0.025  |
| Dementia                                    | 15 (3.2)          | 16 (4.6)          | 0.296  |
| Pregnancy among female patients             | 0 (0)             | 1 (0.3)           | 0.425  |
| Menopause among female patients             | 256/441 (58.0)    | 147/326 (45.1)    | <0.001 |
| Bedridden state                             | 14 (3.0)          | 13 (3.7)          | 0.547  |
| Underlying urinary tract conditions (%)     |                   |                   |        |
| Indwelling urinary catheter                 | 7 (1.5)           | 8 (2.3)           | 0.392  |
| Intermittent catheterization                | 3 (0.6)           | 0 (0)             | 0.266  |
| Benign prostatic hyperplasia                | 4/31 (12.9)       | 13/32 (40.6)      | 0.013  |
| Neurogenic bladder                          | 2 (0.4)           | 14 (4.0)          | <0.001 |
| Urolithiasis                                | 9 (1.9)           | 6 (1.7)           | 0.843  |
| Urinary retention                           | 0 (0)             | 3 (0.9)           | 0.076  |
| Vesicoureteral reflux                       | 1 (0.2)           | 0 (0)             | 1.000  |
| Vaginal wall prolapse                       | 1/441 (0.2)       | 2/326 (0.6)       | 0.578  |
| Polycystic kidney                           | 4 (0.8)           | 0 (0)             | 0.141  |

|                                                                       |            |            |       |
|-----------------------------------------------------------------------|------------|------------|-------|
| Renal tumour                                                          | 0 (0)      | 3 (0.9)    | 0.076 |
| Past history (%)                                                      |            |            |       |
| History of admission during 1 year prior to inclusion                 | 104 (22.0) | 88 (25.2)  | 0.287 |
| History of antibiotic usage during 1 year prior to inclusion          | 115 (24.4) | 108 (31.0) | 0.034 |
| History of urinary tract infection                                    | 106 (22.5) | 72 (20.6)  | 0.530 |
| Use of chemotherapeutic agents                                        | 7 (1.5)    | 6 (1.7)    | 0.789 |
| Use of immunosuppressants                                             | 4 (0.8)    | 10 (2.9)   | 0.027 |
| History of urinary catheterization during 1 month prior to inclusion  | 6 (1.3)    | 1 (0.3)    | 0.249 |
| History of urinary tract operation during 3 months prior to inclusion | 2 (0.4)    | 1 (0.3)    | 1.000 |

---

Abbreviations: SD, standard deviation

Table S4. Comparison of clinical characteristics of patients with community-acquired acute pyelonephritis (from the four hospitals, which participated in both periods)

|                                                                           | 2010-2011 (n=472) | 2017-2018 (n=349) | <i>P</i> |
|---------------------------------------------------------------------------|-------------------|-------------------|----------|
| <b>Clinical characteristics</b>                                           |                   |                   |          |
| Pitt's score, mean $\pm$ SD                                               | 0.48 $\pm$ 0.99   | 0.67 $\pm$ 0.95   | 0.008    |
| Urinary tract infection symptoms (%)                                      | 318 (67.4)        | 180 (51.6)        | <0.001   |
| Costovertebral angle tenderness (%)                                       | 305 (64.6)        | 230 (65.9)        | 0.703    |
| Back pain (%)                                                             | 147 (31.1)        | 53 (15.2)         | <0.001   |
| Vomiting/diarrhoea (%)                                                    | 124 (26.3)        | 84 (24.1)         | 0.473    |
| Haematuria (%)                                                            | 245 (51.9)        | 166 (47.6)        | 0.219    |
| Azotaemia (%)                                                             | 77 (16.3)         | 98 (28.1)         | <0.001   |
| Bacteraemia (%)                                                           | 154 (32.6)        | 137 (39.3)        | 0.050    |
| <b>Initial antibiotic regimen</b>                                         |                   |                   |          |
| Discordant to the antimicrobial susceptibility of causative organisms (%) | 303/332 (91.3)    | 206/282 (73.0)    | <0.001   |
| ESC (%)                                                                   | 248 (52.5)        | 271 (77.7)        | <0.001   |
| FQ (%)                                                                    | 22 (4.7)          | 9 (2.6)           | 0.122    |
| BL/BLI (%)                                                                | 12 (2.5)          | 46 (13.2)         | <0.001   |
| Carbapenem (%)                                                            | 7 (1.5)           | 25 (7.2)          | <0.001   |
| Duration of total antibiotics, days, mean $\pm$ SD                        | 15.40 $\pm$ 6.35  | 21.74 $\pm$ 11.72 | <0.001   |
| Days of change of antibiotics, days, median (IQR)                         | 6 (4-8)           | 2 (2-6)           | <0.001   |
| <b>Outcomes</b>                                                           |                   |                   |          |
| Mortality                                                                 | 11/452 (2.4)      | 1/342 (0.3)       | 0.014    |
| Clinical failure (%)                                                      | 17/452 (3.8)      | 7/342 (2.0)       | 0.162    |
| Hospitalization days, median (IQR)                                        | 8 (6-11)          | 10 (7-14)         | <0.001   |
| Febrile days, median (IQR)                                                | 2 (1-3)           | 3 (1-4)           | <0.001   |

Abbreviations: SD, standard deviation; ESC, extended-spectrum cephalosporins; FQ, fluoroquinolone; BL/BLI, beta-lactam/beta-lactamase inhibitor; IQR, interquartile range
